# Supplementary material for: High-resolution modeling of early contrail evolution from hydrogen-powered aircraft
Source: Copernicus journal article supplement (doi:10.5194/acp-25-7903-2025), 2025-07-25
Supplement: Supplementary file [file acp-25-7903-2025-supplement-title-page.pdf › acp-25-7903-2025-supplement-title-page.pdf]

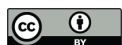

*Supplement of*

## **High-resolution modeling of early contrail evolution from hydrogen-powered aircraft**

**Annemarie Lottermoser and Simon Unterstrasser**

*Correspondence to:* Annemarie Lottermoser ([annemarie.lottermoser@dlr.de](mailto:annemarie.lottermoser@dlr.de))

- [acp-25-7903-2025-supplement-title-page.pdf](#)
- [Supplement\\_Lottermoser\\_Unterstrasser](#)
  - [Supplement\\_Lottermoser\\_Unterstrasser\\_updated.pdf](#)
  - [contrail\\_properties.f90](#)
  - [contrail\\_properties.py](#)

The copyright of individual parts of the supplement might differ from the article licence.
